# Supplementary figures and images for: BRCA2 reversion mutations as a resistance mechanism to olaparib in patients with BRCA2-mutated mCRPC: A Case Series
Source: Research Square preprint supplement (doi:10.21203/rs.3.rs-8249251/v1), 2026-02-02

Supplement

(Supplement 1)


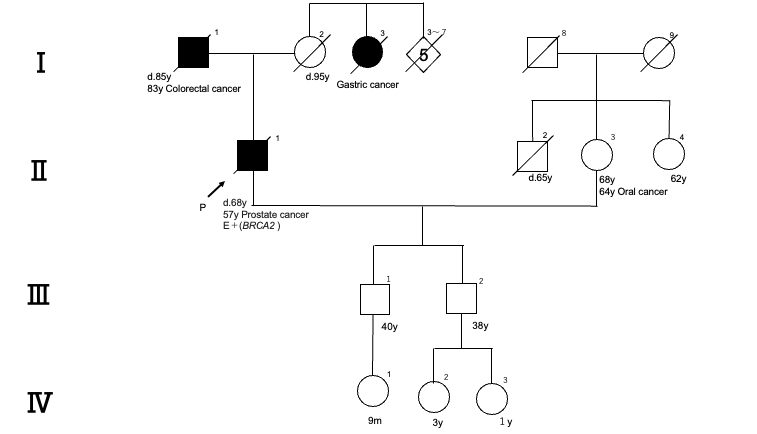


(Supplement 2)


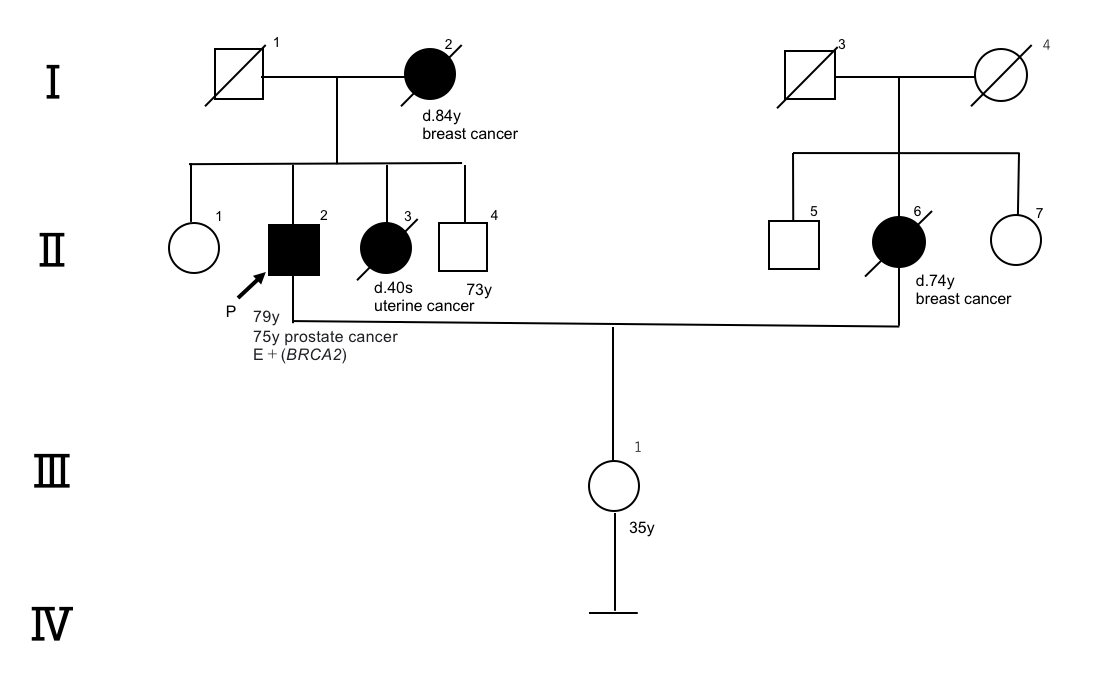


(Supplement 3)


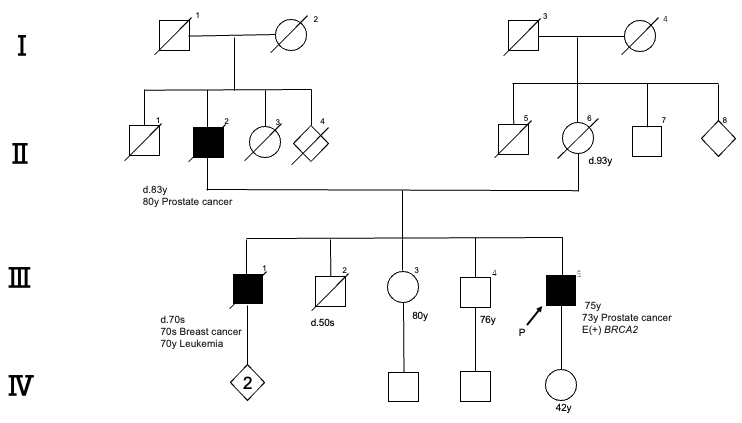

Supplement: Supplementary file 1 [file 159961ae94ff79ed4f96ab9c.docx]
